# Supplementary material for: Self-assembly of two high-nuclearity manganese calixarene-phosphonate clusters: diamond-like Mn16 and drum-like Mn14
Source: Royal Society of Chemistry journal article supplement (doi:10.1039/c5ra02530c), 2015-01-01
Supplement: c5ra02530c1.pdf [file c5ra02530c1.pdf]

## Supporting Information

### Self-assembly of two high-nuclearity manganese calixarene-phosphonate clusters: diamond-Like $\text{Mn}_{16}$ and drum-Like

### $\text{Mn}_{14}$

Kongzhao Su,<sup>ab</sup> Feilong Jiang,<sup>a</sup> Jinjie Qian,<sup>ab</sup> Jie Pan,<sup>ab</sup> Jiandong Pang,<sup>ab</sup>

Xiuyan Wan,<sup>ab</sup> Falu Hu<sup>ab</sup> and Maochun Hong<sup>\*a</sup>

<sup>a</sup>Key Laboratory of Optoelectronic Materials Chemistry and Physics, Fujian Institute of Research on the Structure of Matter, Chinese Academy of Sciences, Fuzhou, 350002, China

<sup>b</sup>University of the Chinese Academy of Sciences, Beijing, 100049, China.

● Corresponding author:

E-mail: [hmc@fjirsm.ac.cn](mailto:hmc@fjirsm.ac.cn).

Tel: +86-591-83714605; Fax: +86-591 / 8379 4946

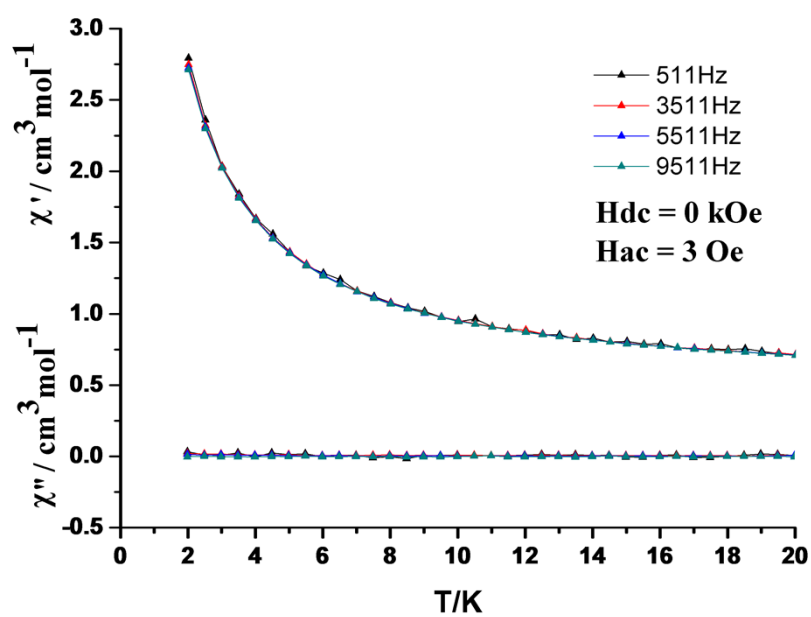

**Figure S1.** Plot of the in-phase (top) and out-of-phase (bottom) ac susceptibility for **2** in a zero dc field and a 3 Oe ac field.

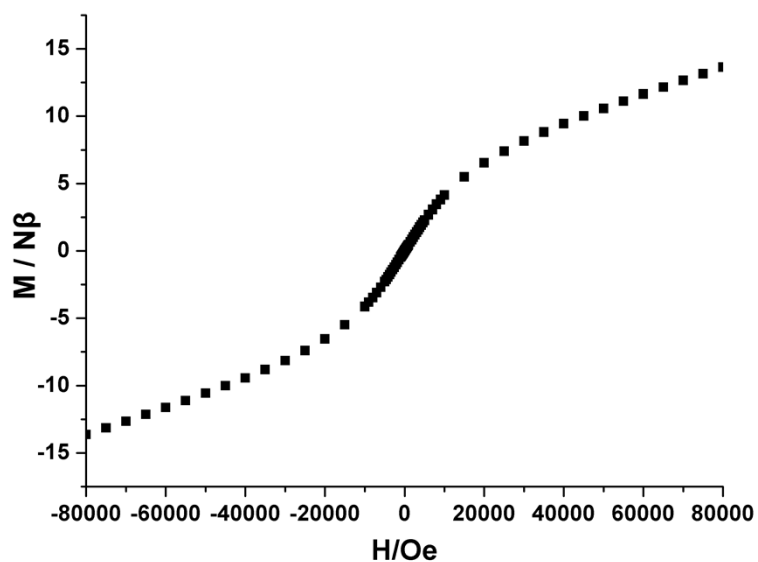

**Figure S2.** The field-dependencies of magnetization of **2** at 2 K in the -80-80 kOe range.

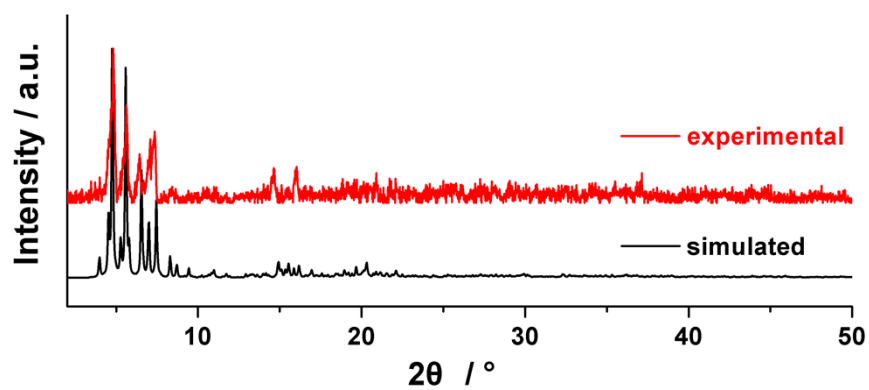

Figure. S3. PXRD of compound 1.

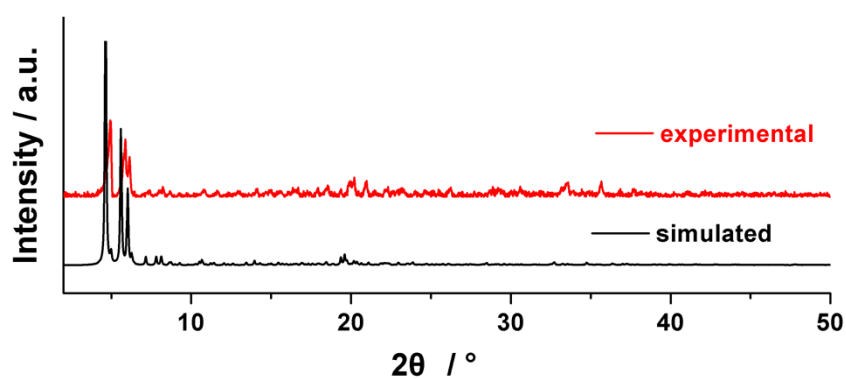

Figure. S4. PXRD of compound 2.

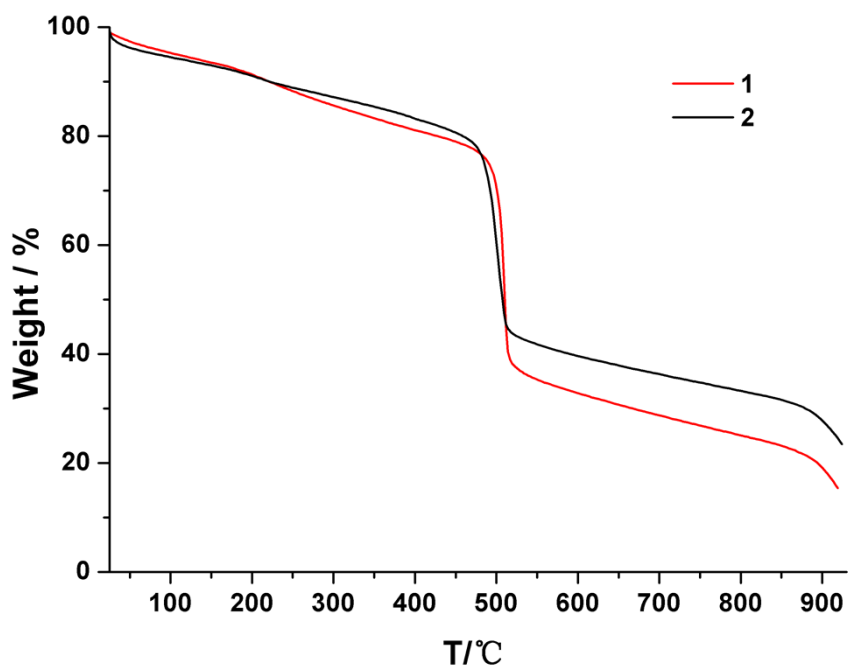

Figure. S5. The TG curves of compounds 1 and 2.
